# Supplementary material
Source: PubMed Central journal article supplement (PMC3624556)
Supplement: JB.02056-12_zjb999092520so1.pdf [file JB.02056-12_zjb999092520so1.pdf]

**Table S1.** Sequences of oligonucleotide primers used in this study

| Primers                | Sequences (5' to 3')                                                             |
|------------------------|----------------------------------------------------------------------------------|
| <i>hfq</i> mutation F  | AATGGCTAAGGGGCAATCATTACAAGACCCGTTCTTAAACGCA<br>TTGCGTTCG GTGTAGGCTGGAGCTGCTTC    |
| <i>hfq</i> mutation R  | GGGGGTCCGGGACACAAAGACTCCCCGTCGTGGAGGAACGGT<br>CACGCTGGTCATATGAATATCCTCCTTA       |
| <i>gcvB</i> mutation F | ATTATAAATTGTCCGTTGAGGAACTGCCAGCAAATACCTATAG<br>TTGCGCCGTGTAGGCTGGAGCTGCTTC       |
| <i>gcvB</i> mutation R | AAGCACCGCAGTTTGCGGTGCTGTAAAAATCAATATGGACAG<br>ACAGGGTACATATGAATATCCTCCTTA        |
| <i>glmZ</i> mutation F | TGAGGTAGAAATTTTCTGCCAGAGTTACCGATATGGCACGTCA<br>TGTGCAGTGTGTAGGCTGGAGCTGCTTC      |
| <i>glmZ</i> mutation R | TGTGTTCACAATCCTATCGCAGATAGCCAGGGCTTATGCTGCT<br>ATAAACCGCATATGAATATCCTCCTTA       |
| <i>micA</i> mutation F | TTTATTTTTGATGCGATGAACTTTCTCGATCGCCAGACGTCTC<br>AGTATATGTGTAGGCTGGAGCTGCTTC       |
| <i>micA</i> mutation R | AGTGATACGCTTAGCTTCGAAGCCTTTTTACAAAGCAAAGCT<br>AGCGCCAACATATGAATATCCTCCTTA        |
| <i>omrA</i> mutation F | GTTGCGATTCCGCGGTAGCGGTTTAATGCGGTGCATTGCTACA<br>GTTCAGATGTGTAGGCTGGAGCTGCTTC      |
| <i>omrA</i> mutation R | ACTAACCGGGGTTAGAGAGTTAATTATGATAATTAAACACAAA<br>TTAAGAGCCATATGAATATCCTCCTTA       |
| <i>rprA</i> mutation F | AATGAGATGATTCCTAATGACTCCAAAAACACCTTTTCATACT<br>ATGGTTACGTGTAGGCTGGAGCTGCTTC      |
| <i>rprA</i> mutation R | GTCTGGCAGGCGGCTCTGAATGCCCGGGACGATCGGTTACCG<br>ATCGTCCTCATATGAATATCCTCCTTA        |
| <i>ryeA</i> mutation F | AGATAATACGTGACGGTAGAACTTTAAGGATCGTGACGTGGCC<br>GGGAAAGGTGTAGGCTGGAGCTGCTTC       |
| <i>ryeA</i> mutation R | TACCCTCAACGGGCGTGCCGAAACCTGCAGAGATAGCGGCC<br>ATATGGCATCATATGAATATCCTCCTTA        |
| <i>ryhA</i> mutation F | GACGCCGTTCAACATCACACATTTTAATGAATCTGGTAACATG<br>TGATGAAGGATT GTGTAGGCTGGAGCTGCTTC |
| <i>ryhA</i> mutation R | AGTTTTACGGCAATGGGTAACAGACGCTGAAAAAAAAATGACC<br>CCGACCGAACATATGAATATCCTCCTTA      |
| <i>ryhB</i> mutation F | GGCGTAACACTGCCGCAATAAGGTGAGACAGGCTCACCGCCG<br>CTACCTGAAGTGTAGGCTGGAGCTGCTTC      |
| <i>ryhB</i> mutation R | CTGGAGCTGGGGGCGCTGTTAGCCAGGTTTAAGTGGACTGTAA<br>GGGATAAACATATGAATATCCTCCTTA       |
| <i>spf</i> mutation F  | AAGATTGGCCGTATTTTGTGAGCTAAGTTAGATTAATGTGTC<br>ATTTGCTGGTGTAGGCTGGAGCTGCTTC       |
| <i>spf</i> mutation R  | GCCGCACAAGCTTAAAACACGCCAGCGTTTATCAGACAGTGAC<br>TGAGATGACATATGAATATCCTCCTTA       |
| <i>sroB</i> mutation F | TTGATGAATAAATAAGTGGTGAATGATGTCGCTTTAAGCGACA<br>ATCGACACGTGTAGGCTGGAGCTGCTTC      |
| <i>sroB</i> mutation R | GAGGGTAACCTTCCCGGCCTGCTAAGCGGCGGCTAAAAAAAAA<br>GGCCAATATCATATGAATATCCTCCTTA      |

---

|                                        |                                          |
|----------------------------------------|------------------------------------------|
| RACE RNA linker                        | GACGAGCACGAGGACACUGACAUGGAGGAGGGAGUAGAAA |
| <i>ryhA</i> reverse primer<br>for RACE | CAGGGAAATTGGTAACCTGT                     |
| <i>rprA</i> reverse primer<br>for RACE | CAGCAATTCTTTAGTAACTC                     |
| <i>arcB</i> qRTPCR F                   | AAACGGGAATATCTGGATGC                     |
| <i>arcB</i> qRTPCR R                   | CTGGCAATCCCAGTATCCTT                     |
| <i>amsG</i> qRTPCR F                   | GCGACAGGTGGCTAAAGAAT                     |
| <i>amsG</i> qRTPCR R                   | TAAGCCATATCCGTGCCATA                     |
| <i>amsK</i> qRTPCR F                   | TCAACTGAAGACCGCCATT                      |
| <i>amsK</i> qRTPCR R                   | TCTGCTTCATCCAGATAGCG                     |
| EAM1647<br>qRTPCR F                    | ATTCCTGTCGCTCTTCTGGT                     |
| EAM1647<br>qRTPCR R                    | CAGTGTAATCGGGCATTG                       |
| <i>eop1</i> qRTPCR F                   | GCCTGTACGAATACGCCAA                      |
| <i>eop1</i> qRTPCR R                   | GCGGCAATAGCTTTCTATCC                     |
| <i>fliC</i> qRTPCR F                   | CACGTCTGGACGAAATTGAC                     |
| <i>fliC</i> qRTPCR R                   | GTTAGCACCCACCTGGATTT                     |
| <i>hrpK</i> qRTPCR F                   | TCAGATCGTCTCGGGTAAGA                     |
| <i>hrpK</i> qRTPCR R                   | AGCAGCGCATCACTGTAATC                     |
| <i>mtgA</i> qRTPCR F                   | TATCGCAGCAGACGGCTA                       |
| <i>mtgA</i> qRTPCR R                   | CAGACTCTATGCCAGGGTT                      |
| <i>ppsA</i> qRTPCR F                   | ACGATCCGCTGGAGTTCTAT                     |
| <i>ppsA</i> qRTPCR R                   | AGTCTGACAAGCGCACAATC                     |
| <i>recA</i> qRTPCR F                   | TGTGCTCTCAGCCAGATACC                     |
| <i>recA</i> qRTPCR R                   | GCAACGGAGTCAACAATGAT                     |
| <i>hfq</i> -pML123 F                   | GATGAGCTCCGGCTGGAAAGATGTTCACT            |
| <i>hfq</i> -pML123 R                   | CGATCTAGAGCCCACTGCGTCAATATCA             |
| <i>rprA</i> -pML123 F                  | GATGAGCTCCGAAATCATTAGCAAGCAGAA           |
| <i>rprA</i> -pML123 R                  | CGATCTAGAGTGGTGCAAACCTGGCTTAG            |
| <i>ryhA</i> -pML123 F                  | GATGAGCTCGGAGAGAAAAAGCGGTTCAA            |
| <i>ryhA</i> -pML123 R                  | CGATCTAGAGTGGGACAACGTTTCAGGAAT           |

---

***ryhA***

3399347

+1

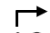

AGACGCCGUUCAACAUCACACAUUUUAAUGAAUCUGGUAACAUGUGAUGAAGGAUUUGCUAAGCUAGU  
AACACGAUGUUUUUAGUUCUACCCAAUACCAAACCUUGUCUCCCGACGAUACCUAUCAGAACAGCACAGG  
UUACCAAUUUCCCUGGUGUUGGCGCAGUCUUCGCGCACCCCGGCUUCGGUCGGGGUCAUUUUUUUUU

+204

3399550

***rprA***

1771835

+1

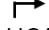

UCAUACUAUGGUUACAGGAUUUGAAAUCUUCCACUGAUUUUGAAUUAACAGACUUACCCCCCUGAGU  
UAACUAAAGAAUUGCUGUGUGUAGUCUUUGCCCAUCCCUUGUGAUGGGCUUUUUUUU

+111

1771945

**Figure S1.** Nucleotide sequences of sRNAs *ryhA* (204 nucleotides) and *rprA* (111 nucleotides) from *E. amylovora* Ea1189. The transcriptional start sites of both *ryhA* and *rprA* were determined using 5' RACE assays and are annotated as +1. Horizontal arrows indicate inverted repeats of the Rho independent terminators.

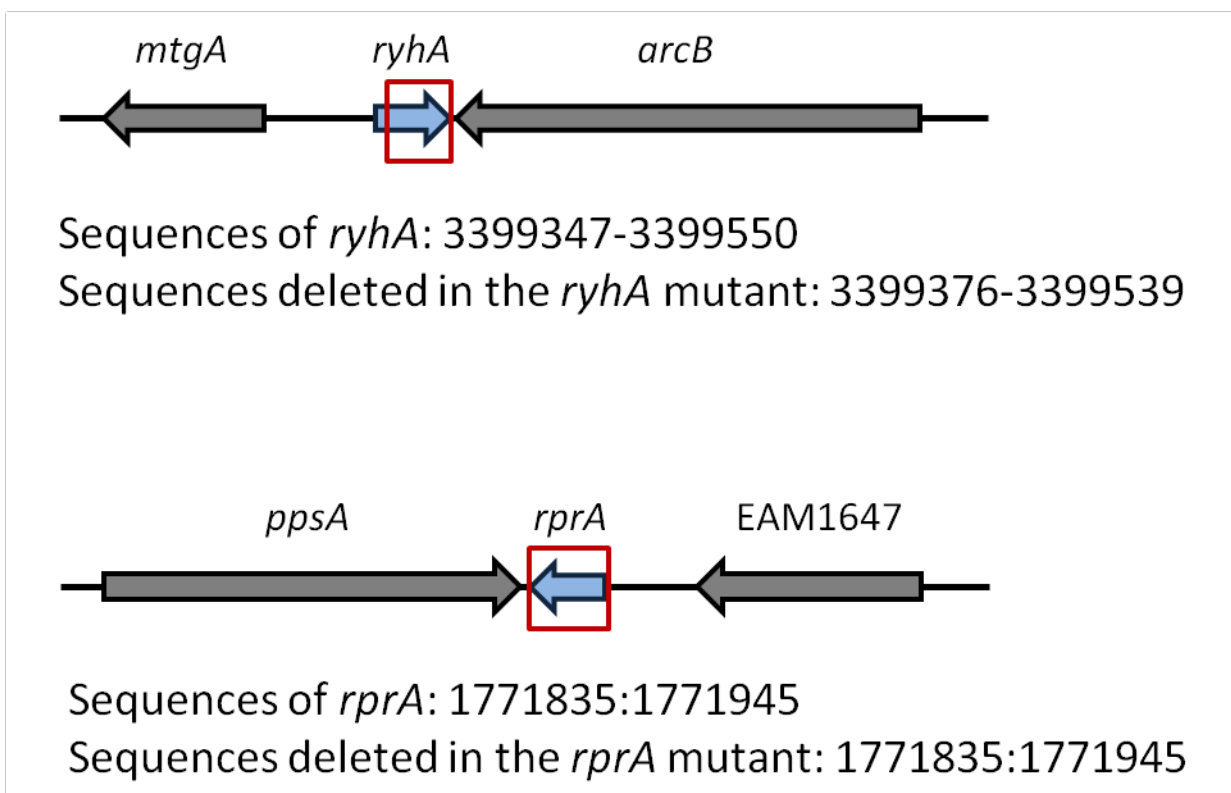

**Figure S2.** Illustration of the sequences deleted in  $Ea1189\Delta ryhA$  and  $Ea1189\Delta rprA$  and the genomic context of these sRNAs. The 5' end and 3' end of the  $ryhA$  and  $rprA$  genes were determined using a 5' RACE assay and the location of the Rho-independent terminator sequences, and annotated on the genome of *E. amylovora*. Red boxes indicate sequences deleted in the  $\Delta ryhA$  and  $\Delta rprA$  mutants. Specific sequences deleted in  $\Delta ryhA$  and  $\Delta rprA$  as well as the genome location of  $ryhA$  and  $rprA$  are also indicated.

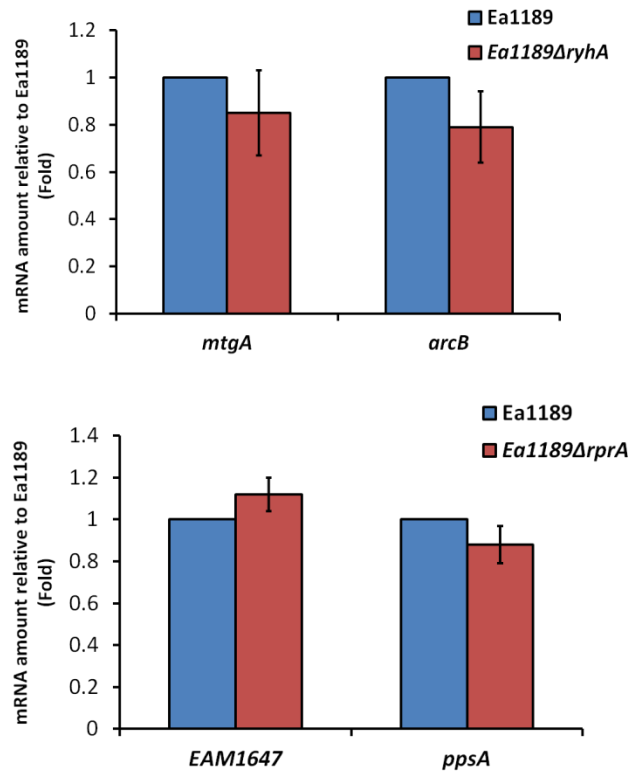

**Figure S3.** (A) Relative mRNA amount of *mtgA* and *arcB* in Ea1189 and Ea1189Δ*ryhA*. (B) Relative mRNA amount of *EAM1647* and *ppsA* in Ea1189 and Ea1189Δ*rprA*. mRNA amount was quantified by qRT-PCR. Experiments contained three replicates and were conducted twice. Data from one representative experiment are shown. No significant differences were observed between wild type and the sRNA mutants ( $P > 0.05$ ).

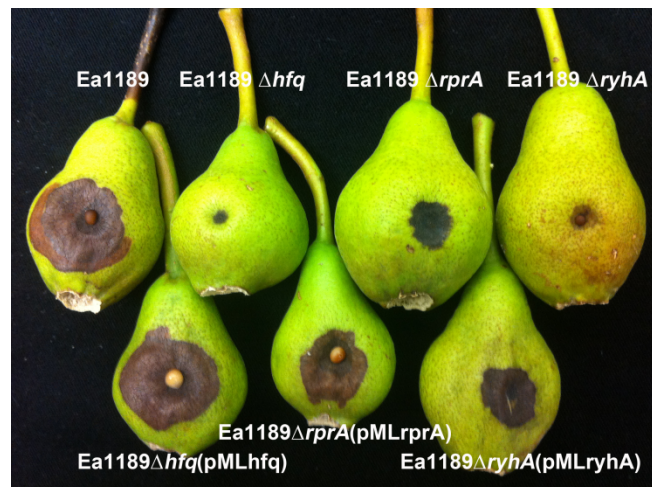

**Figure S4.** Virulence of *E. amylovora* Ea1189, Ea1189Δ*hfq*, Ea1189Δ*rprA*, Ea1189Δ*ryhA*, Ea1189Δ*hfq*(pML*hfq*), Ea1189Δ*rprA*(pML*rprA*), and Ea1189Δ*ryhA*(pML*ryhA*) in immature pears, at 5 days post inoculation (DPI).
